# Supplementary material for: Bidirectional interactions between indomethacin and the murine intestinal microbiota
Source: eLife journal article supplement (doi:10.7554/elife.08973), 2015-12-22

Figure 5 - figure supplement 1

A -  $\beta$ -glucuronidase

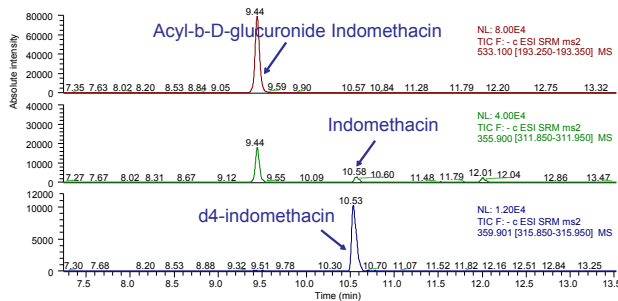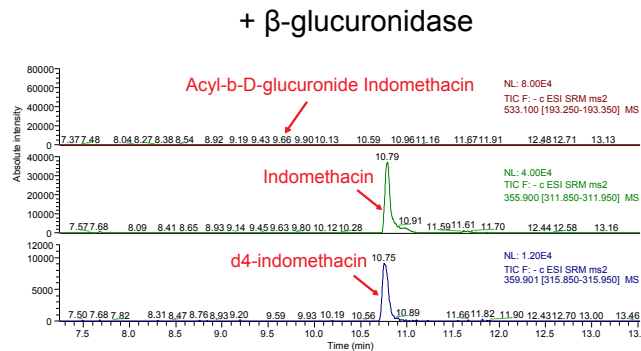

B

Urine\_Con

$\beta$ -glucuronidase

Urine\_Abx

$\beta$ -glucuronidase

■ indomethacin    ■ indomethacin glucuronide

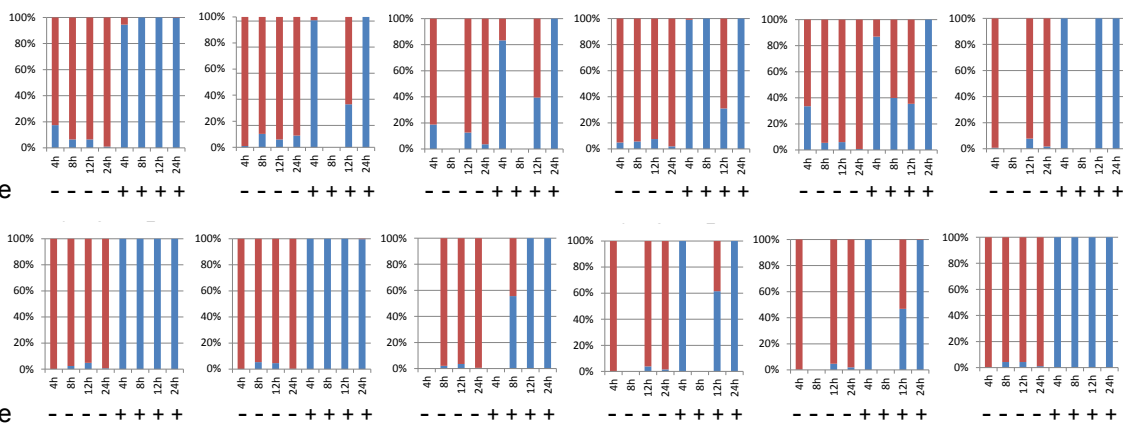

C

Feces\_Con

$\beta$ -glucuronidase

Feces\_Abx

$\beta$ -glucuronidase

■ indomethacin    ■ indomethacin glucuronide

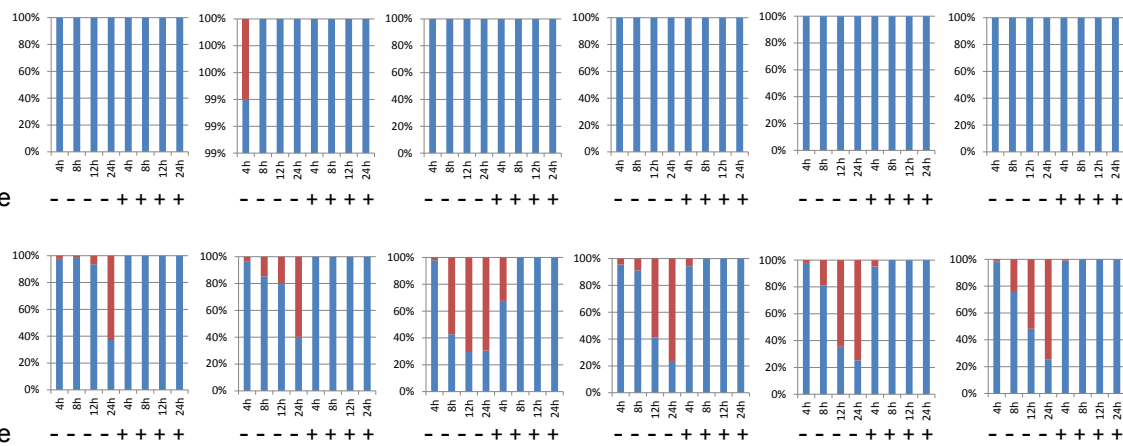

Supplement: supp [file elife-08973-supp-v1.zip]
