# Supplementary figures and images for: Bidirectional interactions between indomethacin and the murine intestinal microbiota
Source: eLife journal article supplement (doi:10.7554/elife.08973), 2015-12-22

Figure 2 - figure supplement 2

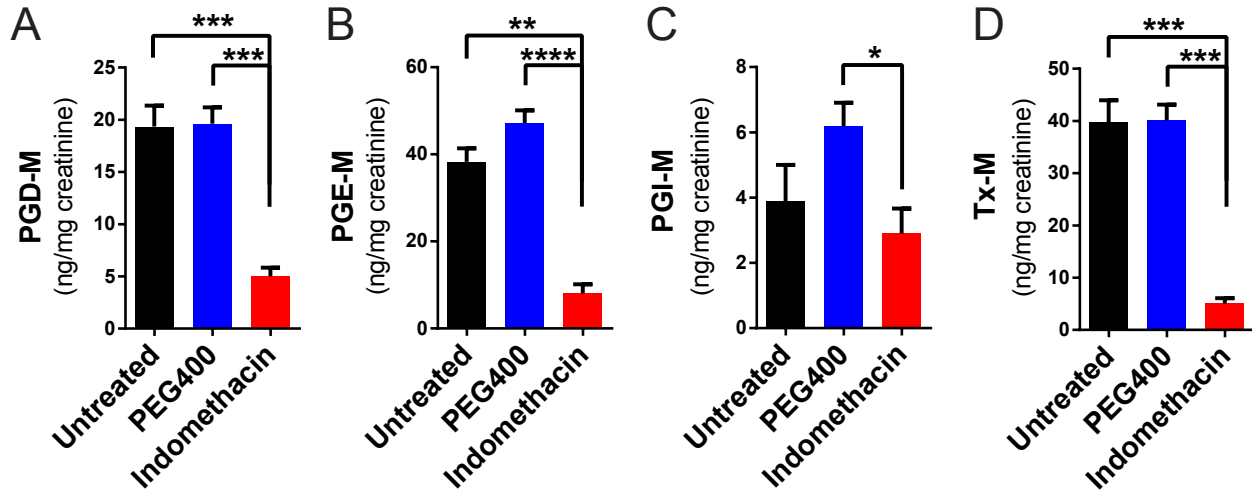

Supplement: supp [file elife-08973-supp-v1.zip]

Figure 2 - figure supplement 4

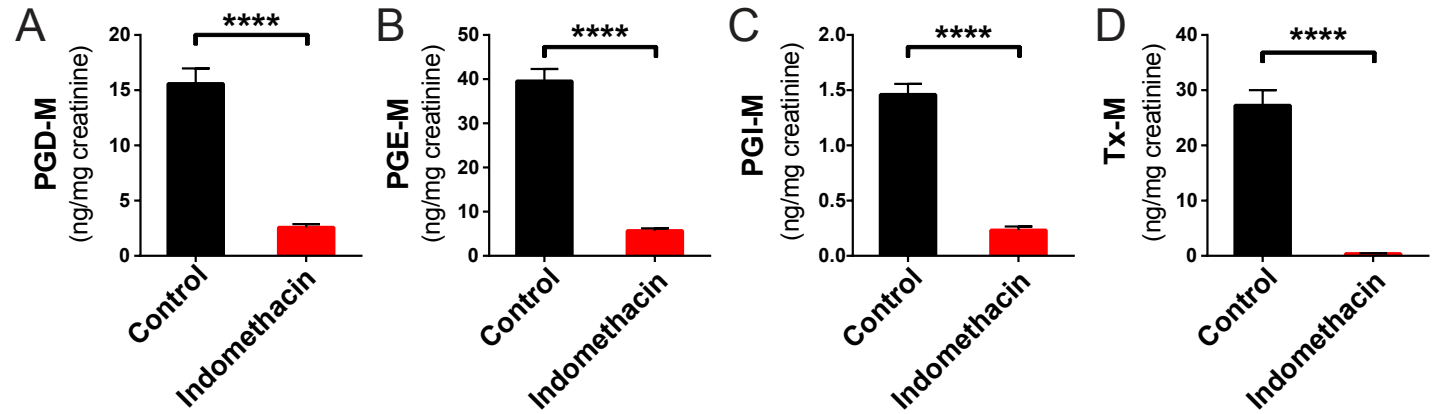

Supplement: supp [file elife-08973-supp-v1.zip]

Figure 3 - figure supplement 2

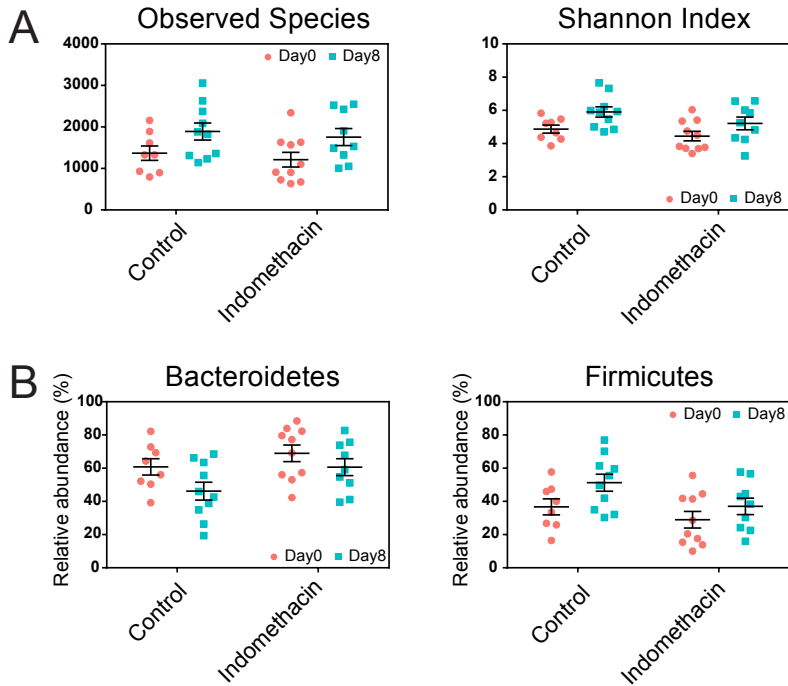

Supplement: supp [file elife-08973-supp-v1.zip]

Figure 3 - figure supplement 3

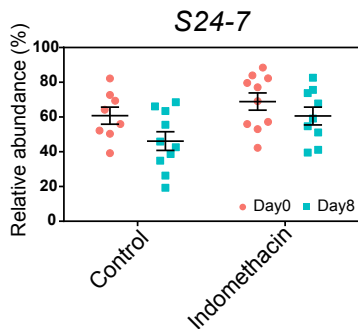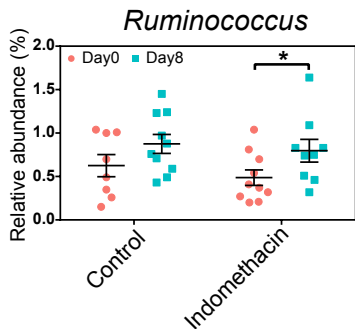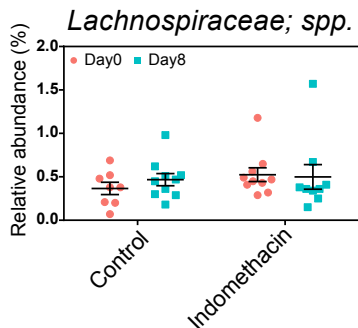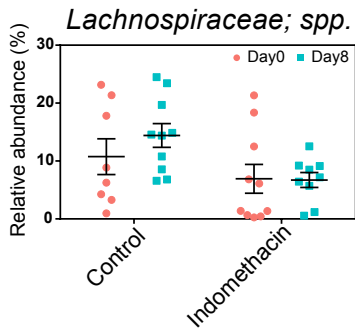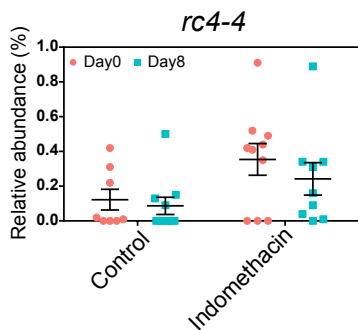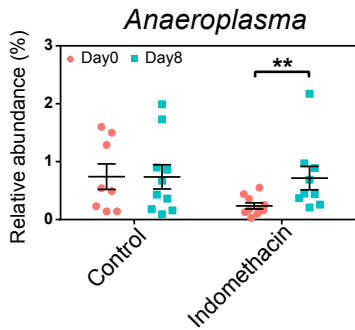

Supplement: supp [file elife-08973-supp-v1.zip]

Figure 2 - figure supplement 1

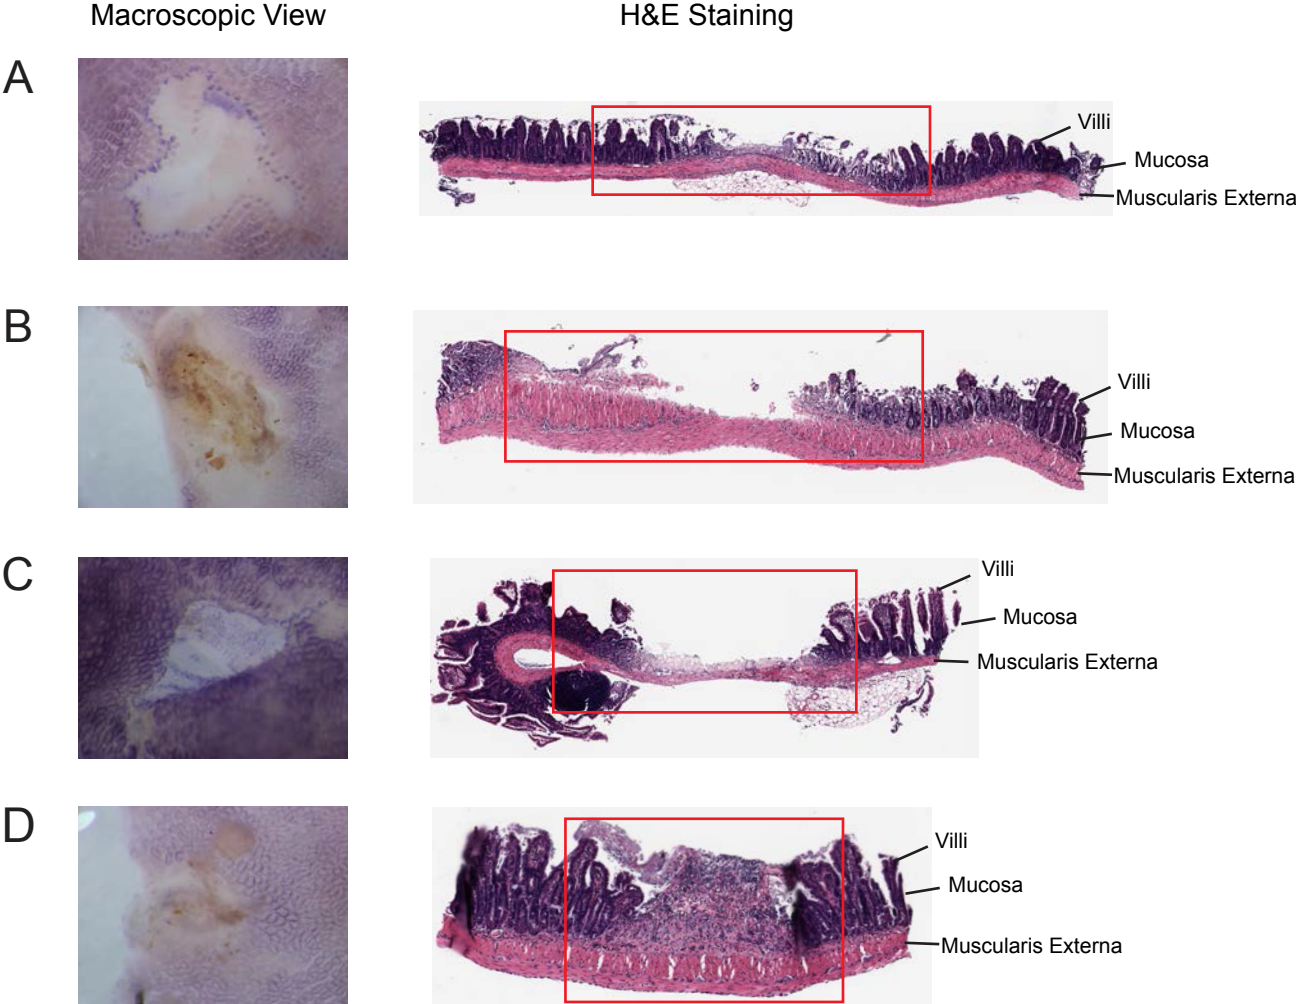

Supplement: supp [file elife-08973-supp-v1.zip]

Figure 2 - figure supplement 3

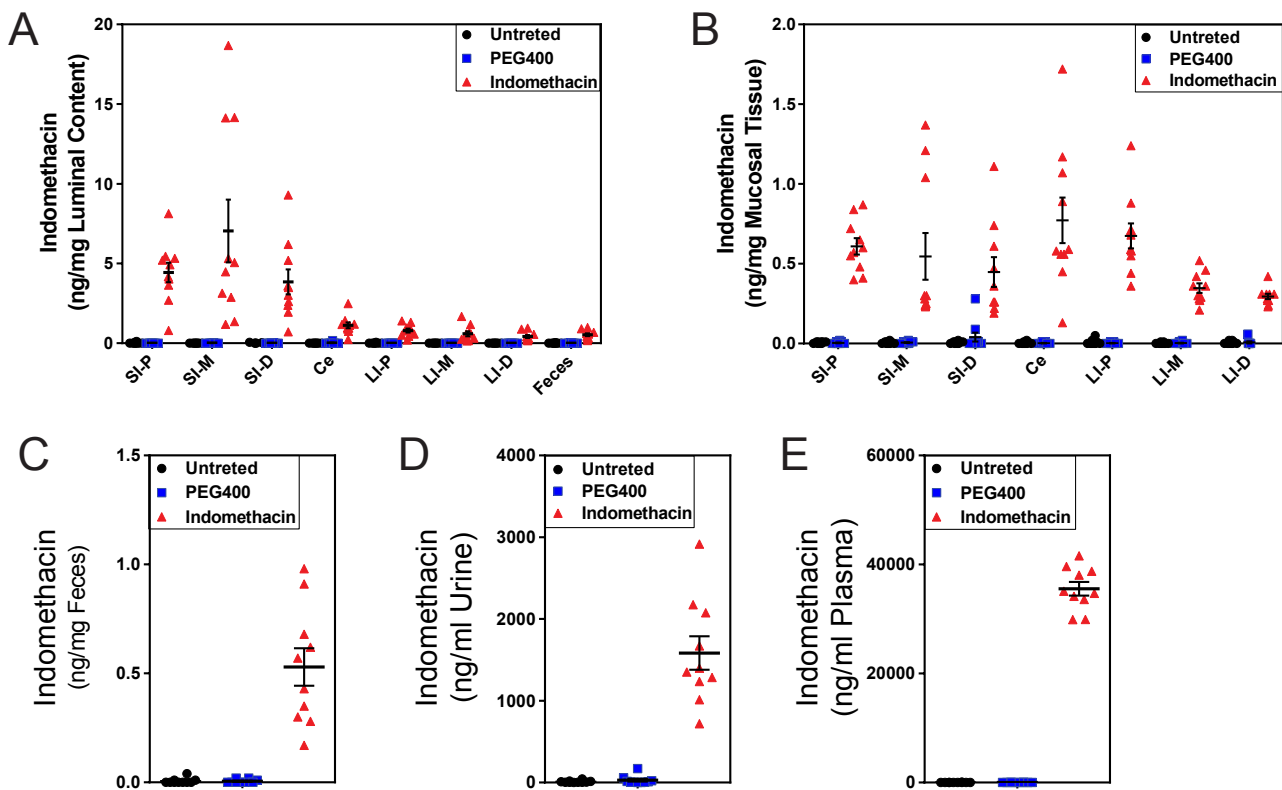

Supplement: supp [file elife-08973-supp-v1.zip]

Figure 4 - figure supplement 1

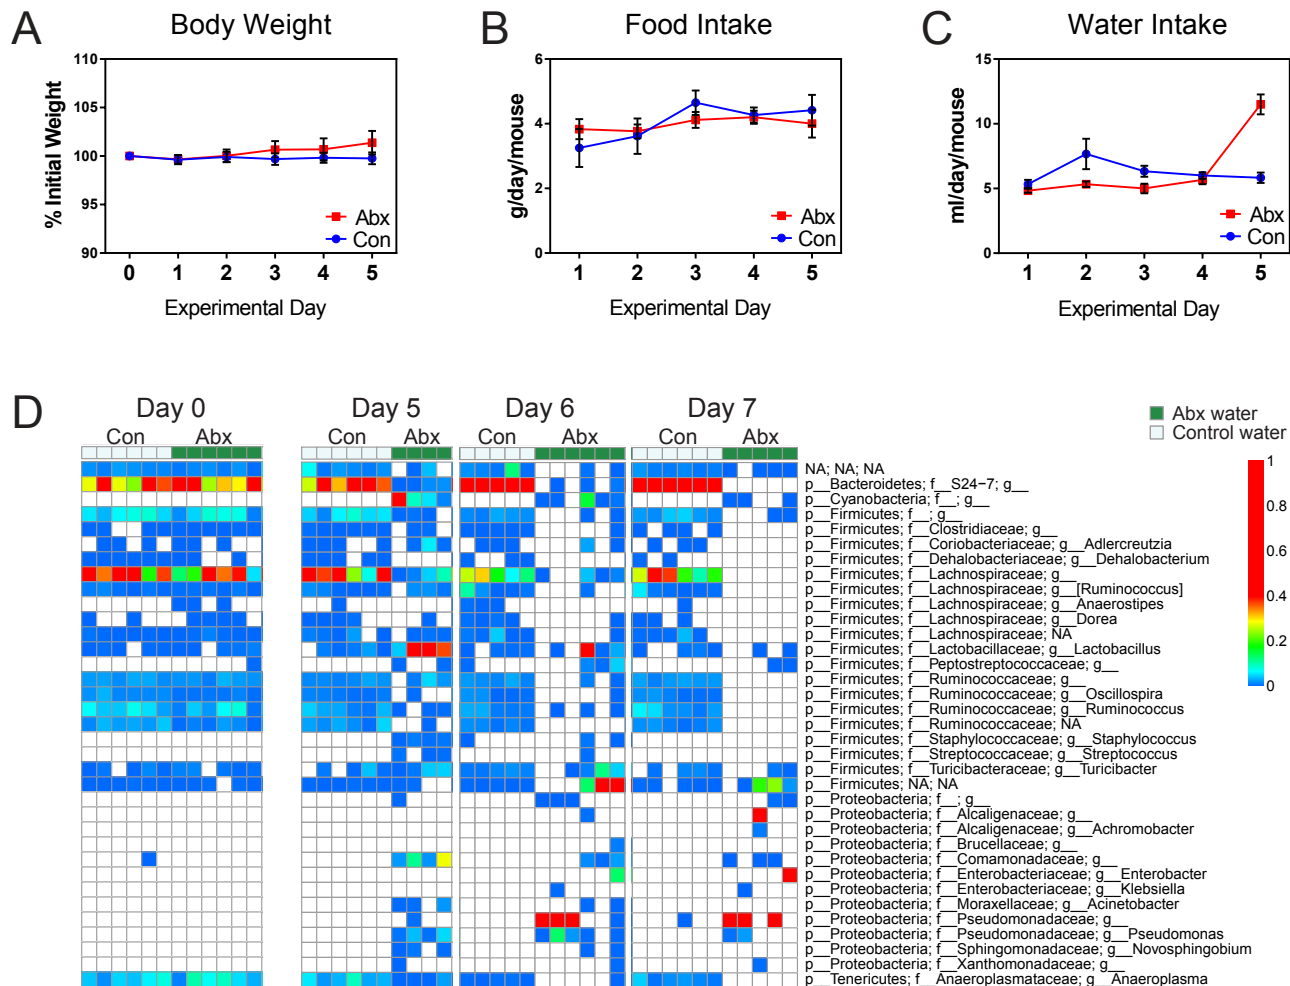

Supplement: supp [file elife-08973-supp-v1.zip]

Figure 2 - figure supplement 5

A

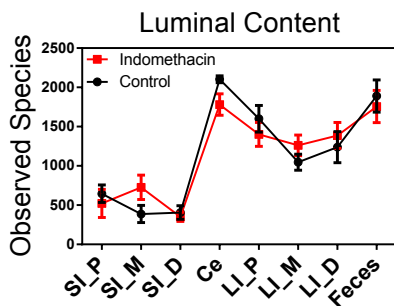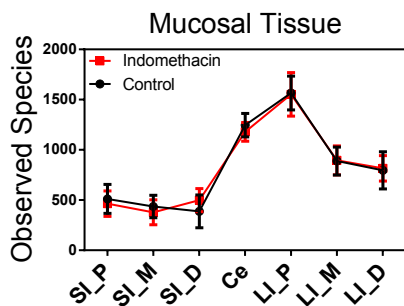

B

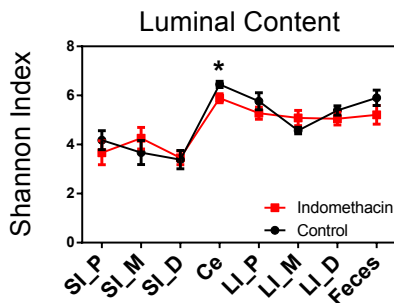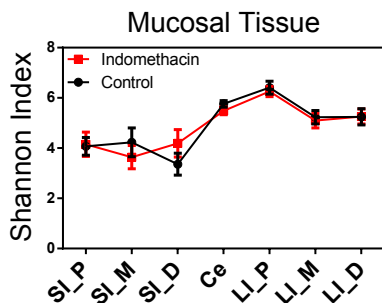

C

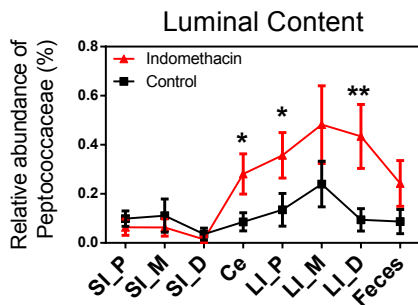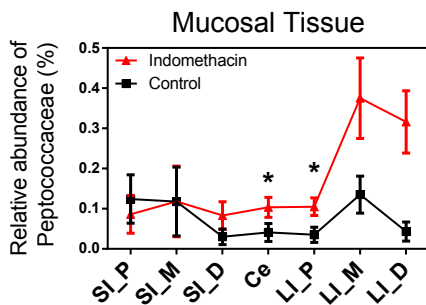

D

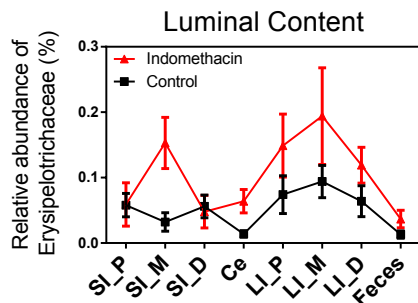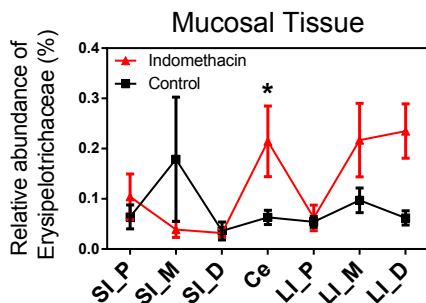

Supplement: supp [file elife-08973-supp-v1.zip]

Figure 3 - figure supplement 1

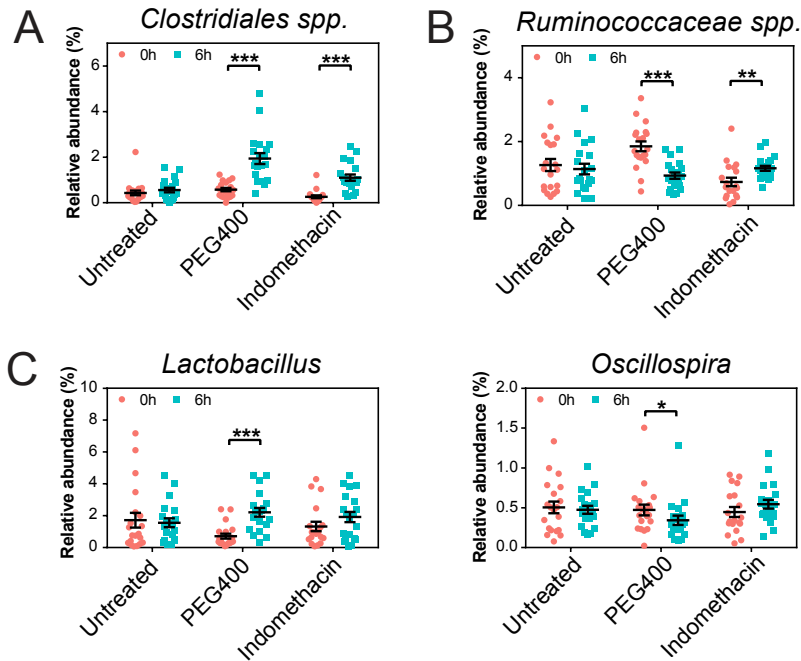

Supplement: supp [file elife-08973-supp-v1.zip]
